# Supplementary material
Source: MDPI journal article supplement (https://www.mdpi.com/2073-4344/10/2/202)
Supplement: s1 [file s1]

## Supplementary Materials

**Table S1.**

**Table S1.** The relative atomic ratio of O elements over different samples obtained by XPS.

| Samples | Relative atomic ratio (at.%) |                |                |                                                                   |
|---------|------------------------------|----------------|----------------|-------------------------------------------------------------------|
|         | O <sub>α</sub>               | O <sub>β</sub> | O <sub>γ</sub> | O <sub>α</sub> /(O <sub>α</sub> +O <sub>β</sub> +O <sub>γ</sub> ) |
| VCT     | 36%                          | 64%            | 0%             | 36%                                                               |
| VCA     | 37%                          | 63%            | 0%             | 37%                                                               |
| VCZR    | 32%                          | 68%            | 0%             | 32%                                                               |
| VCZS    | 5%                           | 6%             | 89%            | 5%                                                                |

**Table S2.**

**Table S2.** Quantitative analysis of NH<sub>3</sub>-TPD over different samples.

| Samples | Acid amount (a.u.) |                 |                  | Total acid amount (a.u.)                            |
|---------|--------------------|-----------------|------------------|-----------------------------------------------------|
|         | S <sub>I</sub>     | S <sub>II</sub> | S <sub>III</sub> | S <sub>I</sub> + S <sub>II</sub> + S <sub>III</sub> |
| VCT     | 820                | 1040            | 1130             | 2990                                                |
| VCA     | 800                | 980             | 1050             | 2830                                                |
| VCZR    | 910                | /               | 840              | 1750                                                |
| VCZS    | 1340               | 430             | 260              | 2030                                                |

**Figure S1.**

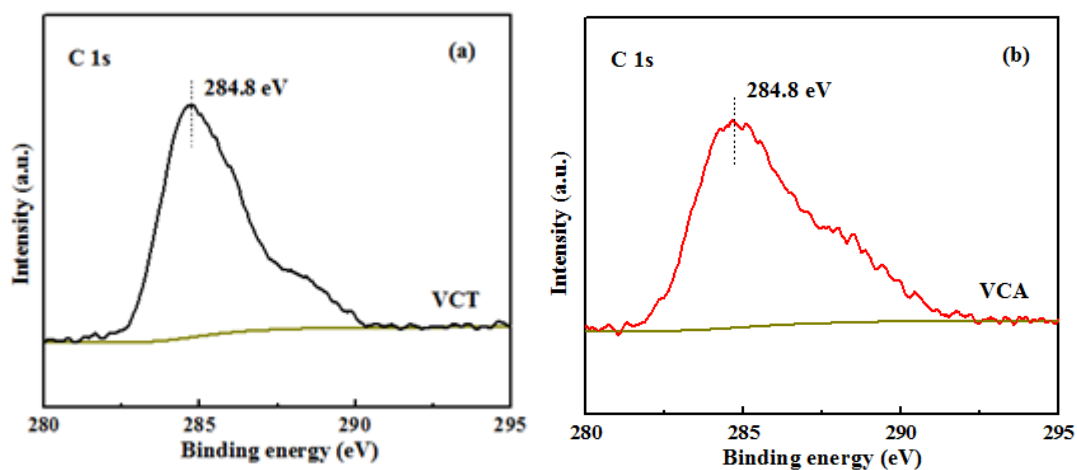

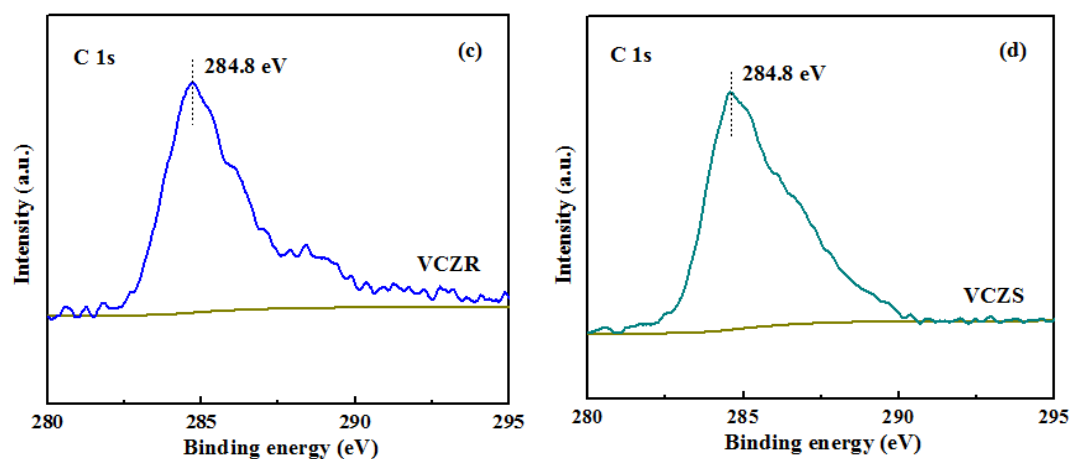

**Figure S1 (a-d).** The C 1s high-resolution scans spectra of different samples.

The C 1s spectra of different samples in XPS were shown as follows: In our study, the C 1s high-resolution scans spectra of different samples were listed in S1. From the pictures, the peaks of C 1s over different samples appeared at around 284.8 eV and matched with the standard value of C1s binding energy. Thus, we inferred that the experimental error has little effect on the results we obtained. In other words, the experimental error could be ignored.
